# Supplementary material for: CD8 T Cells Contribute to Vaccine Protection Against SARS-CoV-2 in Macaques
Source: PubMed Central journal article supplement (PMC9407944; doi:10.1126/sciimmunol.abq7647), 2022-08-09
Supplement: sciimmunol.abq7647_sm.pdf [file sciimmunol.abq7647_sm.pdf]

Supplementary Materials for

**CD8 T cells contribute to vaccine protection against SARS-CoV-2 in macaques**

Jinyan Liu *et al.*

Corresponding author: Dan H. Barouch, dbarouch@bidmc.harvard.edu

*Sci. Immunol.* **7**, eabq7647 (2022)  
DOI: 10.1126/sciimmunol.abq7647

**The PDF file includes:**

Figs. S1 to S6

**Other Supplementary Material for this manuscript includes the following:**

Data file S1  
MDAR Reproducibility Checklist

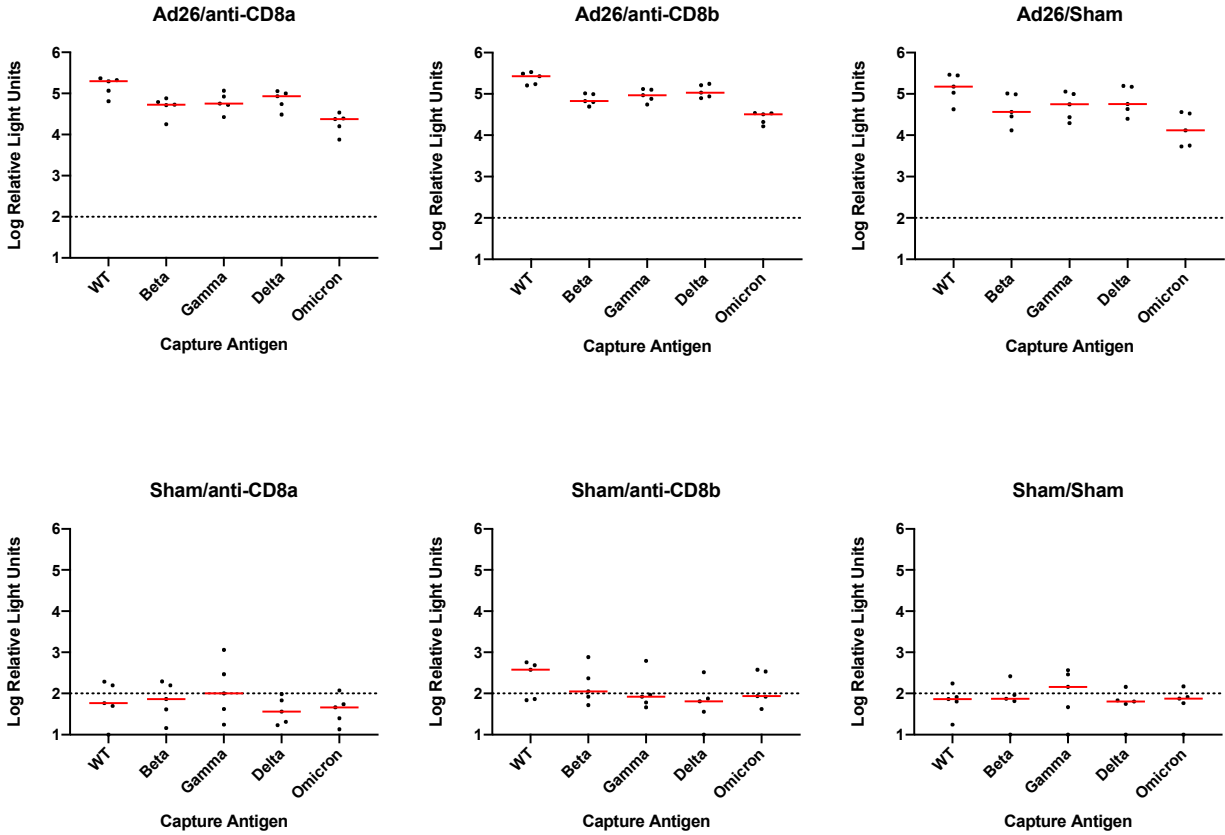

**Figure S1. Spike-specific binding antibody responses following vaccination.** Spike-specific antibody responses against multiple variants are shown at week 4 following vaccination with the Meso Scale Discovery electrochemiluminescence assay (ECLA). Dotted lines represent limits of quantitation. Medians (red bars) are shown.

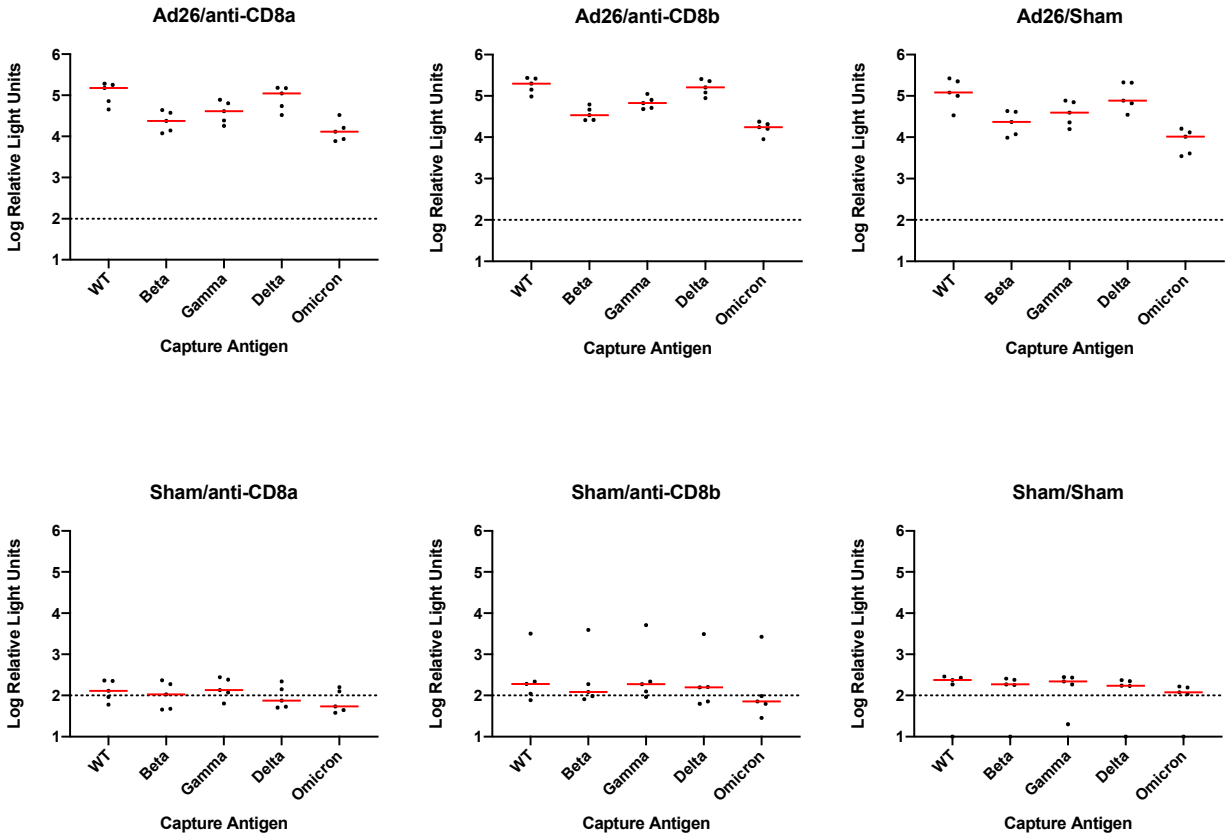

**Figure S2. RBD-specific binding antibody responses following vaccination.** RBD-specific antibody responses against multiple variants are shown at week 4 following vaccination with the Meso-Scale Discovery electrochemiluminescence assay (ECLA). Dotted lines represent limits of quantitation. Medians (red bars) are shown.

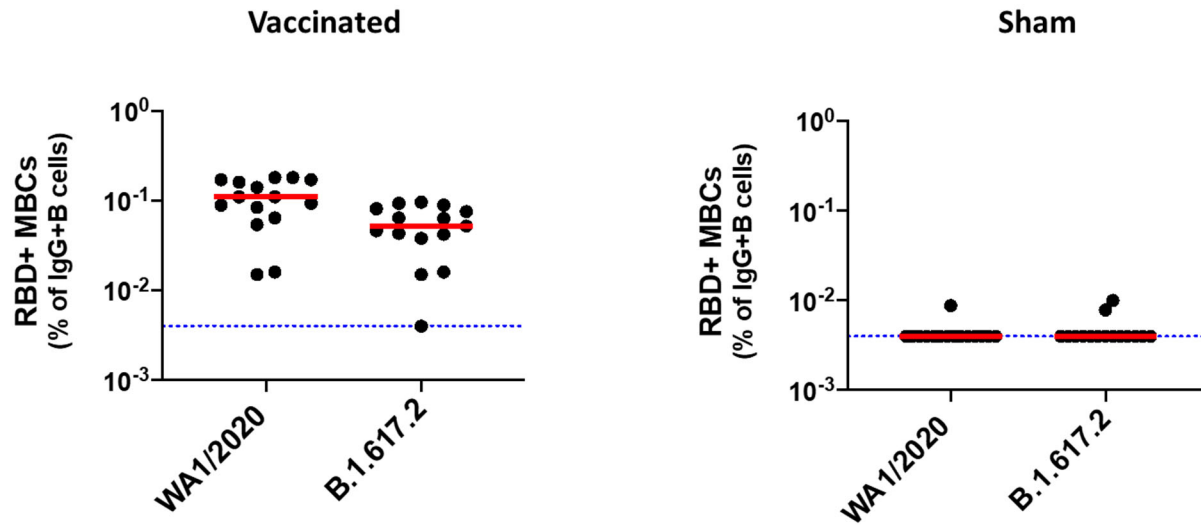

**Figure S3. RBD-specific memory B cell responses following vaccination.** WA1/2020 and B.1.617.2 (Delta) RBD-specific memory B cell (MBC) responses in peripheral blood at week 4 following vaccination. Dotted lines represent limits of quantitation. Medians (red bars) are shown.

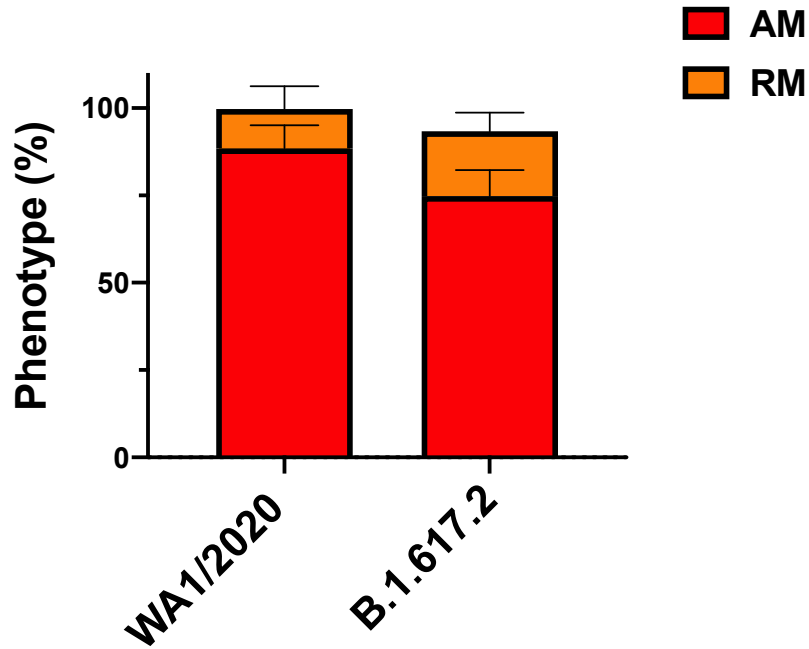

**Figure S4. Phenotype of RBD-specific memory B cells following vaccination.** Phenotype of WA1/2020 and B.1.617.2 (Delta) RBD-specific memory B cell (MBC) responses in peripheral blood at week 4 following vaccination. Red, activated memory (AM) B cells. Orange, resting memory (RM) B cells.

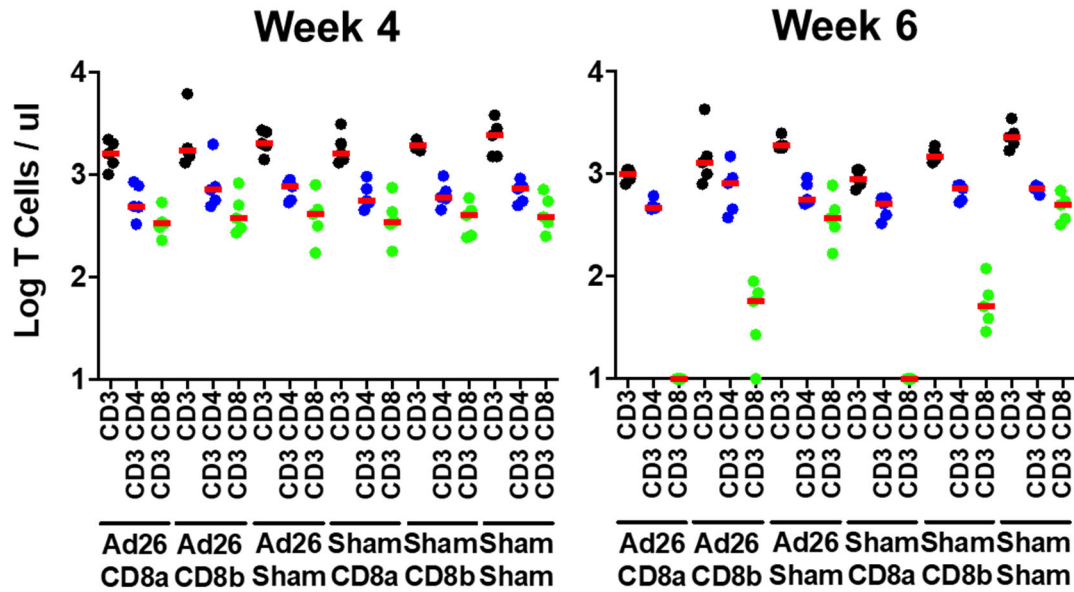

**Figure S5. CD8 depletion.** CD3<sup>+</sup>, CD8<sup>+</sup>CD3<sup>+</sup>, and CD4<sup>+</sup>CD3<sup>+</sup> cells in peripheral blood at week 4 prior to CD8 depletion and at week 6 after CD8 depletion. At week 5, we administered 50 mg/kg of the anti-CD8 $\alpha$  CDR-grafted rhesus IgG1 antibody (MT807R1) or the anti-CD8 $\beta$  CDR-grafted rhesus IgG1 antibody (CD8b255R1) or an isotype-matched sham mAb (N=5/group) by the intravenous route in the Ad26.COV2.S and the sham vaccinated animals.

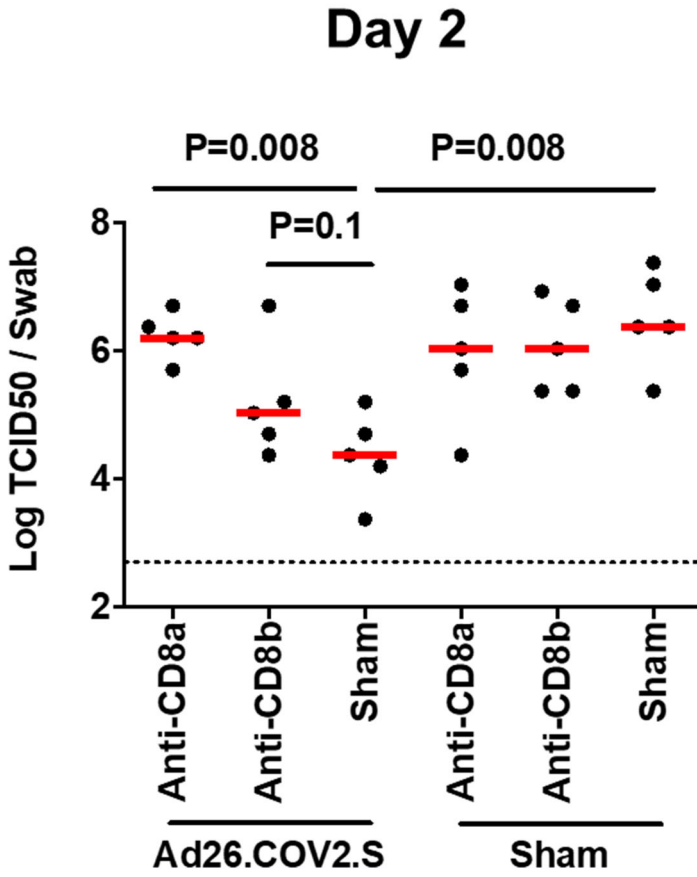

**Figure S6. TCID<sub>50</sub> titers following SARS-CoV-2 challenge.** Log TCID<sub>50</sub> copies/swab in nasal swabs (NS) on day 2 following SARS-CoV-2 Delta challenge. Medians (red lines) are shown.
